# Supplementary material for: Identification of a Novel PPAR Signature for Predicting Prognosis, Immune Microenvironment, and Chemotherapy Response in Bladder Cancer
Source: Hindawi journal article supplement (doi:10.1155/2021/7056506), 2021-12-30

**A**

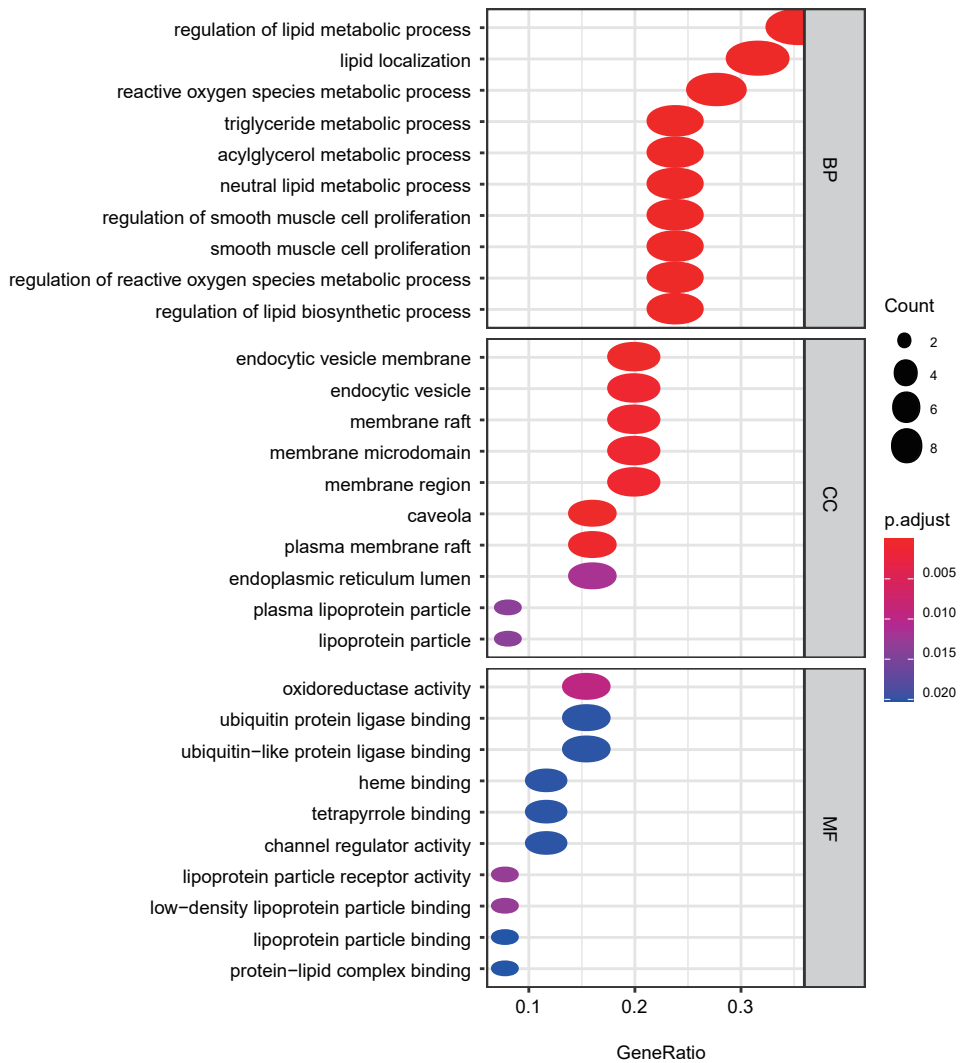

**B**

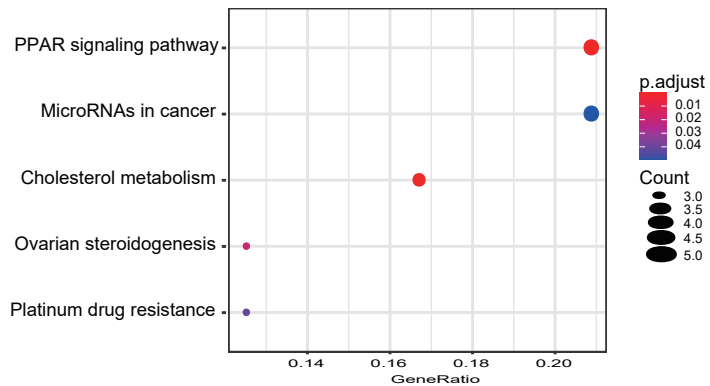

Supplement: f1 [file 7056506.f1.pdf]
