# Supplementary material for: Identification of a Novel PPAR Signature for Predicting Prognosis, Immune Microenvironment, and Chemotherapy Response in Bladder Cancer
Source: Hindawi journal article supplement (doi:10.1155/2021/7056506), 2021-12-30

**A**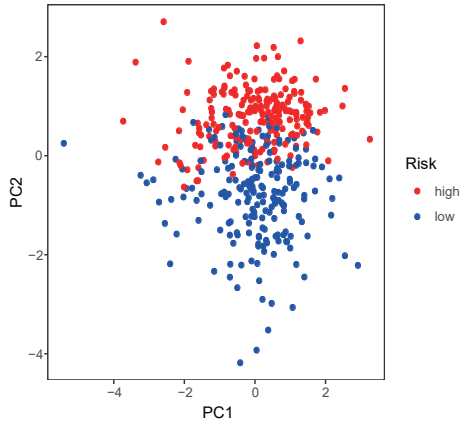**B**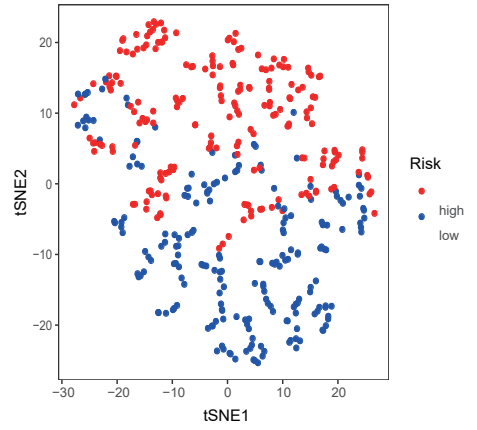**C**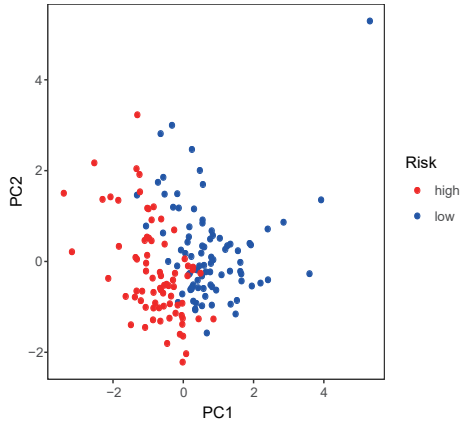**D**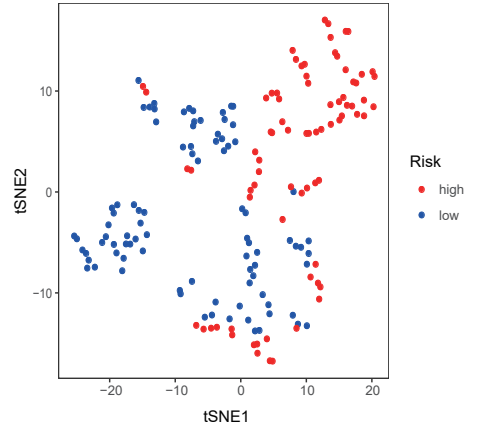**E**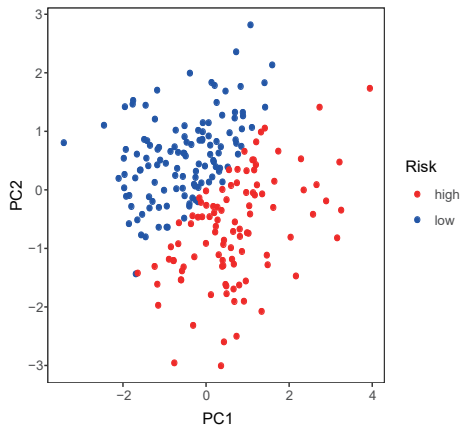**F**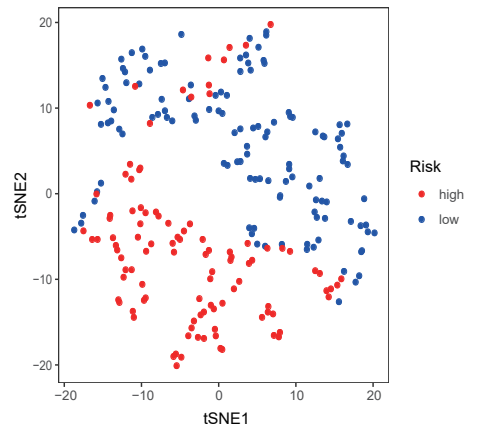

Supplement: f2 [file 7056506.f2.pdf]
